# Supplementary material for: A transferrin-targeted nanoplatform for MRI-guided visualization and potent suppression of tumors and pulmonary metastatic lesions
Source: Royal Society of Chemistry journal article supplement (doi:10.1039/d5nh00325c), 2025-01-01
Supplement: d5nh00325c13.pdf [file d5nh00325c13.pdf]

## Supporting Information

### **Transferrin-Targeted Nanoplatfrom for MRI-Guided Visualization and Potent Suppression of Tumors and Pulmonary Metastatic Lesion**

Liya Tian<sup>a†</sup>, Pengju Ma<sup>bt</sup>, Wenxiu Zhuang<sup>b</sup>, Yinlong Xu<sup>c</sup>, Lihua Pang<sup>b</sup>, Kai Guo<sup>a</sup>, Ren Ke<sup>a</sup>, Xueli Xu<sup>b</sup>, Xiao Sun<sup>\*a</sup>, Shunzhen Zheng<sup>\*c</sup>

<sup>a</sup>Medical Science and Technology Innovation Center, Shandong Cancer Hospital and Institute, Shandong First Medical University & Shandong Academy of Medical Sciences, Jinan 250000, China

<sup>b</sup>School of Science, Shandong Jianzhu University, Jinan, 250101, China

<sup>c</sup>Department of Hepatobiliary Surgery, Shandong Provincial Hospital Affiliated to Shandong First Medical University, Jinan 250021, China

E-mail addresses: sunxiao@sdfmu.edu.cn (X. Sun), zsz5512920@hotmail.com (S. Zheng)

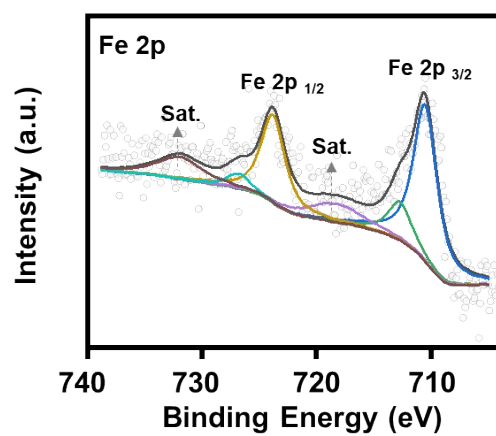

Figure S1. XPS spectra of the Fe 2p regions.

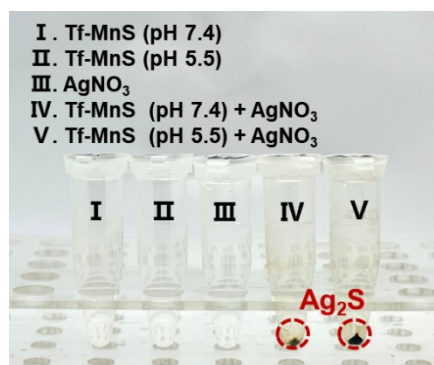

Figure S2. Images of detecting H<sub>2</sub>S generated by Tf-MnS at different pH values using silver nitrate ( $\text{AgNO}_3 + \text{H}_2\text{S} \rightarrow \text{Ag}_2\text{S}$ ).

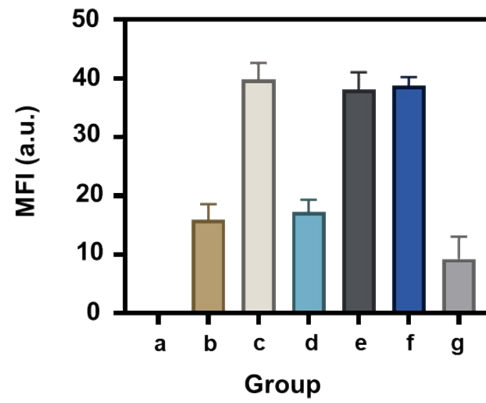

Figure S3. The corresponding statistical data of cellular uptake. (a. Tf-MnS 0  $\mu\text{g/mL}$ , b. Tf + Tf-MnS 40  $\mu\text{g/mL}$ , c. Tf-MnS 40  $\mu\text{g/mL}$ , d. M- $\beta$ -CD + Tf-MnS 40  $\mu\text{g/mL}$ , e. CPZ + Tf-MnS 40  $\mu\text{g/mL}$ , f. AMR + Tf-MnS 40  $\mu\text{g/mL}$ , g. 4°C + Tf-MnS)

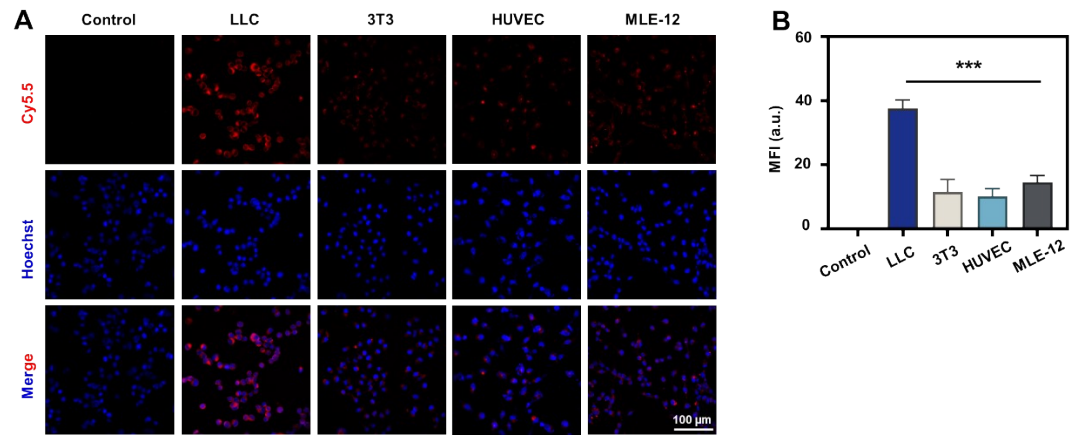

Figure S4. (A) CLSM observation of cellular uptake of Tf-MnS in different cell types and (B) corresponding statistical data (n=3, \*\*\*p < 0.001).

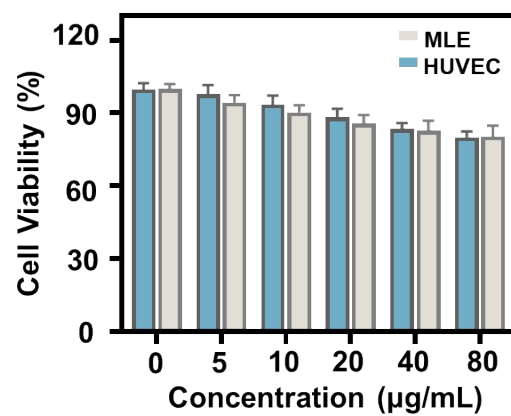

Figure S5. Cell viability of MLE cells and HUVEC treated by Tf-MnS.

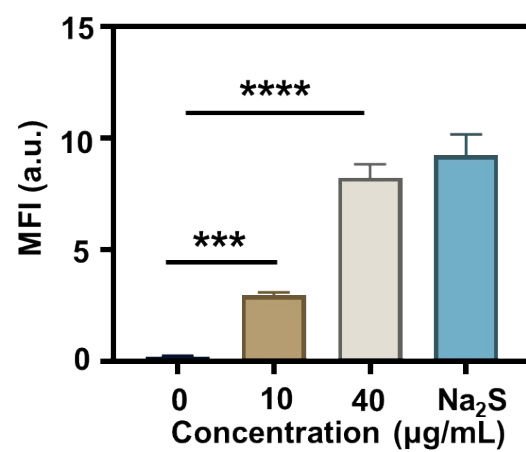

Figure S6. Quantification of mean fluorescence intensity (MFI) for H<sub>2</sub>S production.

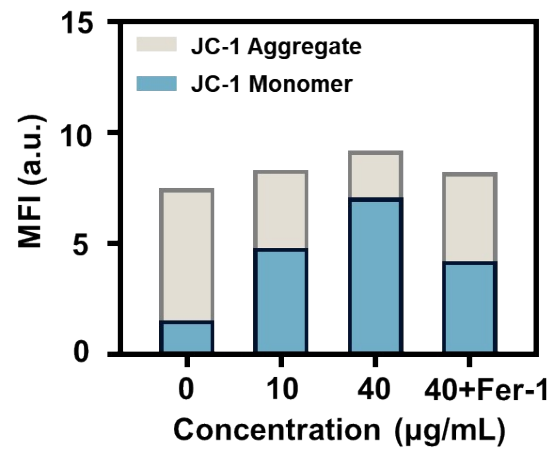

Figure S7. Quantification of MFI for JC-1.



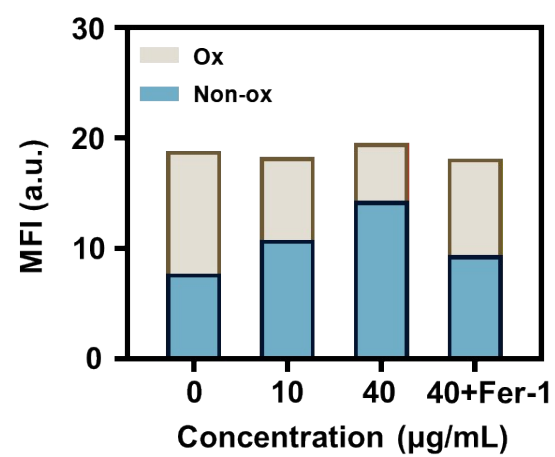

Figure S8. Quantification of MFI for C11-BODIPY.

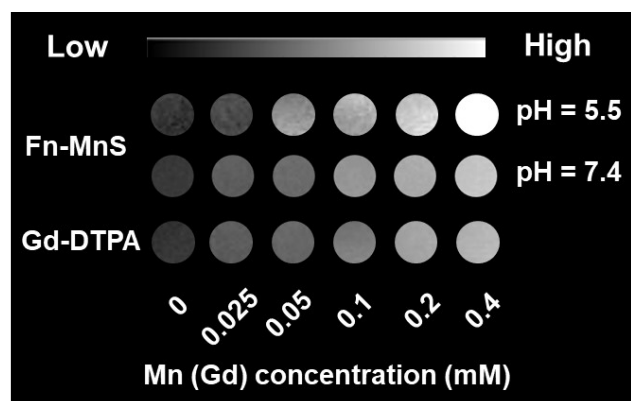

Figure S9. T<sub>1</sub>-weighted MR images of agarose gels containing Tf-MnS and Gd-DTPA.

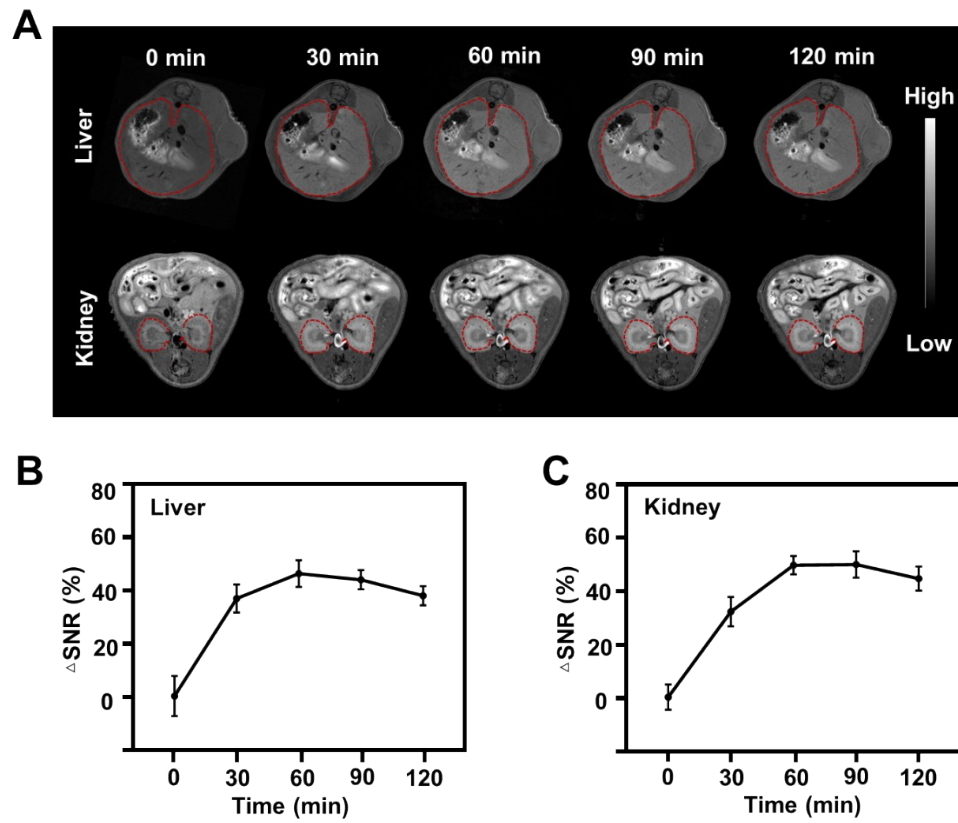

Figure S10. (A) MR images after intravenous injection of Tf-MnS, and the dashed red circles indicated liver and kidney. (B) and (C) Comparative analysis of the change in  $\Delta$ SNR of liver and kidney.

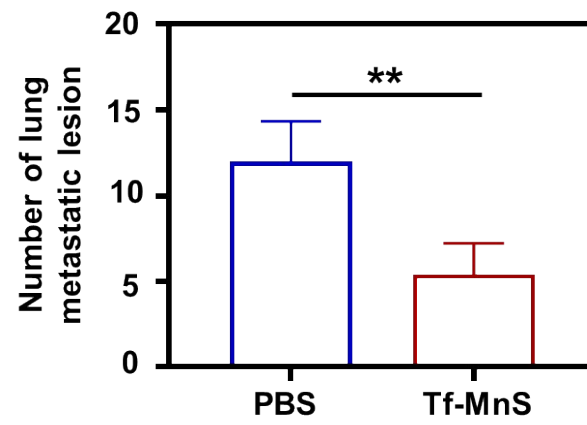

Figure S11. The number of visible lung metastatic lesion in each group (n=5, \*\*p < 0.01).

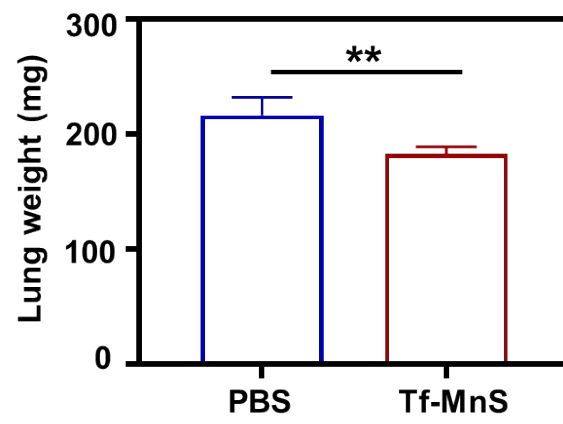

Figure S12. Lung weight of excised lungs in each group (n=5, \*\*p < 0.01).

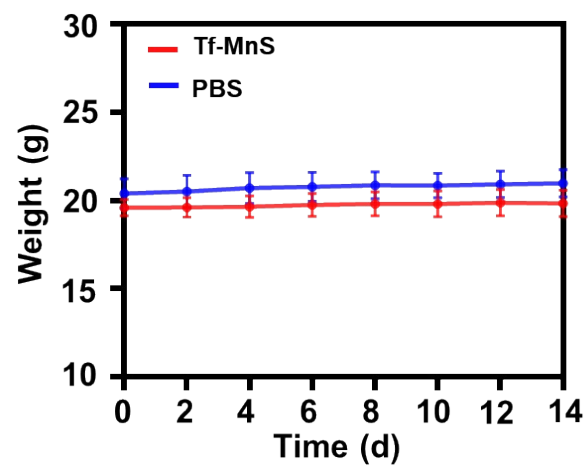

Figure S13. Body weight changes in tumor-bearing mice subjected to various treatments were recorded bi-daily.

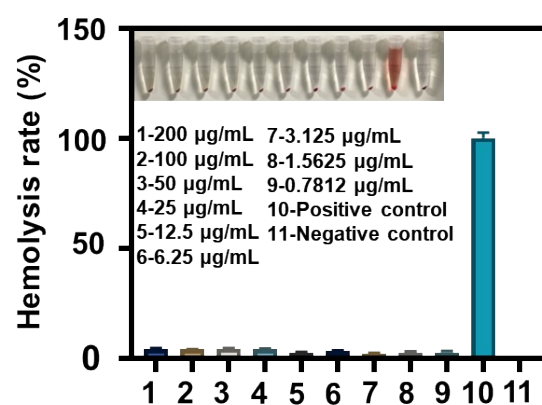

Figure S14. Hemolysis assay with different concentration of Tf-MnS.
