# Supplementary figures and images for: A transferrin-targeted nanoplatform for MRI-guided visualization and potent suppression of tumors and pulmonary metastatic lesions
Source: Royal Society of Chemistry journal article supplement (doi:10.1039/d5nh00325c), 2025-01-01

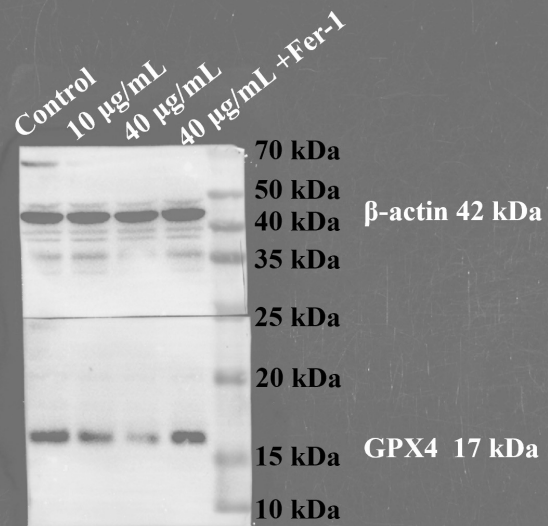

Supplement: d5nh00325c12.pdf [file d5nh00325c12.pdf]

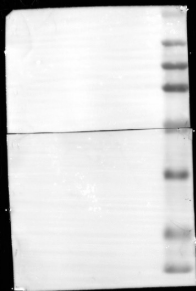

Supplement: d5nh00325c6.pdf [file d5nh00325c6.pdf]
